# Supplementary material for: Functionalized Tyrosinase-Lignin Nanoparticles as Sustainable Catalysts for the Oxidation of Phenols
Source: MDPI journal article supplement (doi:10.3390/nano8060438), 2018-06-15
Supplement: s1 [file s1]

# Functionalized Tyrosinase-Lignin Nanoparticles as Sustainable Catalysts for the Oxidation of phenols

Eliana Capecchi<sup>1</sup>, Davide Piccinino<sup>1</sup>, Ines Delfino<sup>1</sup>, Paolo Bollella<sup>2</sup>, Riccarda Antiochia<sup>2</sup>, Raffaele Saladino<sup>1</sup>, \*

<sup>1</sup> Department of Biological and Ecological Sciences, University of Tuscia, Via S. Camillo de Lellis snc, 01100 Viterbo, Italy; eliana.capecchi@studenti.unitus.it; d.piccinino@unitus.it; delfino@unitus.it.

<sup>2</sup> Department of Chemistry and Drug Technologies, Sapienza University of Rome P.le Aldo Moro 5, 00185 Rome, Italy; paolo.bollella@uniroma1.it; riccarda.antiochia@uniroma1.it.

\*Correspondence: saladino@unitus.it; Tel. 39 0761 357284:

## Structural modifications in OL-tyr evaluated by Gel Permeation Chromatography analysis (GPC)

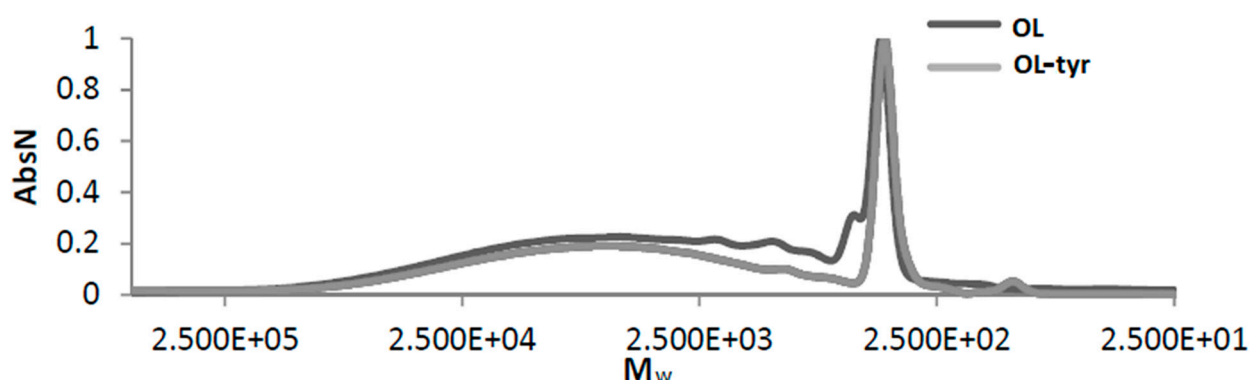

**Figure S1.** Gel Permeation Chromatography (GPC) of lignin Organosolv (OL black line) and after the treatment with tyrosinase (OL-tyr grey line).

## The UV-vis absorption spectra of OL nanoparticles and OL-PDDA nanoparticles

The qualitative determination of the interaction between OL nanoparticles and OL-PDDA nanoparticles was demonstrated with UV-vis absorption measurements. Figure S2 show the UV-vis spectra of PDDA (Brown line), OL nanoparticles (Blue line) and OL-PDDA nanoparticles (Grey line). Adsorption peak at 276 nm corresponds to the shift of the characteristic B band of PDDA when adsorbed on lignin, this result has been previously reported and confirm the deposition of the PDDA layer on OL nanoparticles [1].

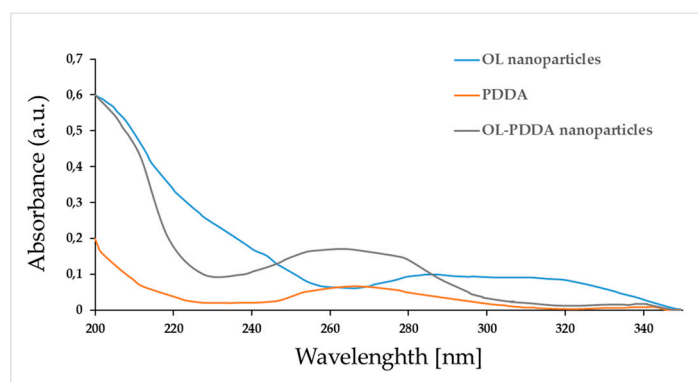

**Figure S2.** The UV-vis absorption spectra of OL nanoparticles coated with PDDA.

- [1] Jiang, C.; He, H.; Jiang, H.; Ma, L.; Jia, D. M. Nano-lignin filled natural rubber composites: Preparation and characterization. *Express Polym. Lett.* **2013**, *7* 480-493; doi:10.3144/expresspolymlett.2013.44.
